# Supplementary material for: Leber Hereditary Optic Neuropathy: Molecular Pathophysiology and Updates on Gene Therapy
Source: MDPI journal article supplement (doi:10.3390/biomedicines10081930), 2022-08-09
Supplement: s1 [file s1]

---

# **Recent advance in gene therapy for Leber hereditary optic neuropathy: a systematic review**

**(Supplemental Materials)**

---

# Supplemental Material

**Supplemental Material S1.** Search strategy

**Supplemental Material S2.** Assessment of Cochrane Risk of Bias tool (ROB)

**Supplemental Material S3.** Assessment of Newcastle-Ottawa Scale (NOS) tool

**Supplemental Material S1**  
**Search strategy**

# Supplemental Material S1

## Search strategy

### Primary search steps:

1. Leber hereditary optic neuropathy
2. Leber hereditary optic atrophy
3. Leber optic atrophy
4. LHON
5. gene therapy
6. recombinant gene
7. gene delivery
8. (#1 or #2 or #3 or #4) and ( #5 or #6)

### Final syntax in PubMed (an example):

**((((Leber hereditary optic neuropathy) OR (Leber hereditary optic atrophy)) OR (Leber optic atrophy)) OR (LHON)) AND (((gene therapy) OR (recombinant gene)) OR (gene delivery)) Sort by: Publication Date**

**Supplemental Material S2**  
**Assessment of**  
**Cochrane Risk of Bias**  
**tool (ROB)**

Supplemental Material S2

Assessment of Cochrane Risk of Bias tool (ROB)

|                       | Random sequence generation (selection bias)                                         | Allocation concealment (selection bias)                                             | Blinding of participants and personnel (performance bias)                           | Blinding of outcome assessment (detection bias)                                     | Incomplete outcome data (attrition bias)                                            | Selective reporting (reporting bias)                                                 | Other bias                                                                            |
|-----------------------|-------------------------------------------------------------------------------------|-------------------------------------------------------------------------------------|-------------------------------------------------------------------------------------|-------------------------------------------------------------------------------------|-------------------------------------------------------------------------------------|--------------------------------------------------------------------------------------|---------------------------------------------------------------------------------------|
| NCT02064569           |  |  |  |  |  |  |  |
| NCT02652767 (RESCUE)  |  |  |  |  |  |  |  |
| NCT02652780 (REVERSE) |  |  |  |  |  |  |  |

## **Supplemental Material S3**

# **Assessment of Newcastle-Ottawa Scale (NOS) tool**

## Supplemental Material S3

### Assessment of Newcastle-Ottawa Scale (NOS) tool

| Trials                     | Selection                                |                                     |                           |                                                                          | Comparability                                 | outcomes              |                                                 |                                  | Total quality score |
|----------------------------|------------------------------------------|-------------------------------------|---------------------------|--------------------------------------------------------------------------|-----------------------------------------------|-----------------------|-------------------------------------------------|----------------------------------|---------------------|
|                            | Representativeness of the exposed cohort | Selection of the non-exposed cohort | Ascertainment of exposure | Demonstration that outcome of interest was not present at start of study | Comparability based on the design or analysis | Assessment of outcome | Was follow-up long enough for outcomes to occur | Adequacy of follow up of cohorts |                     |
| NCT02161380                | *                                        | *                                   | *                         |                                                                          | *                                             | *                     |                                                 | *                                | 6                   |
| NCT03153293                | *                                        | *                                   | *                         |                                                                          | *                                             | *                     |                                                 | *                                | 6                   |
| NCT03406104                | *                                        | *                                   | *                         |                                                                          | **                                            | *                     | *                                               | *                                | 7                   |
| EUDRACT N° 2013-001405-90. | *                                        | *                                   | *                         |                                                                          | **                                            | *                     | *                                               | *                                | 7                   |
